# Supplementary material for: Microfiltration Membranes for the Removal of Bisphenol A from Aqueous Solution: Adsorption Behavior and Mechanism
Source: MDPI journal article supplement (doi:10.3390/w14152306), 2022-07-25
Supplement: s1 [file s1]

Archive with 1 entries (1 files):
- Supplementary materials.pdf
