# Supplementary material for: Microfiltration Membranes for the Removal of Bisphenol A from Aqueous Solution: Adsorption Behavior and Mechanism
Source: MDPI journal article supplement (doi:10.3390/w14152306), 2022-07-25
Supplement: s1 [file s1 › Supplementary materials.pdf]

## Supplementary Materials for:

### Microfiltration membranes for the removal of Bisphenol A from aqueous solution: Adsorption behavior and mechanism

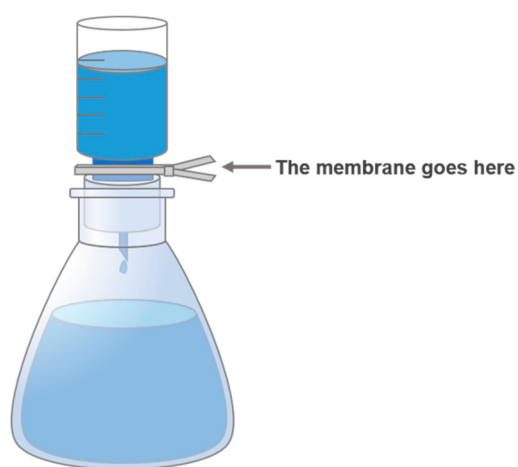

**Figure S1:** The schematic diagram of the experimental apparatus of rapid filtration adsorption.

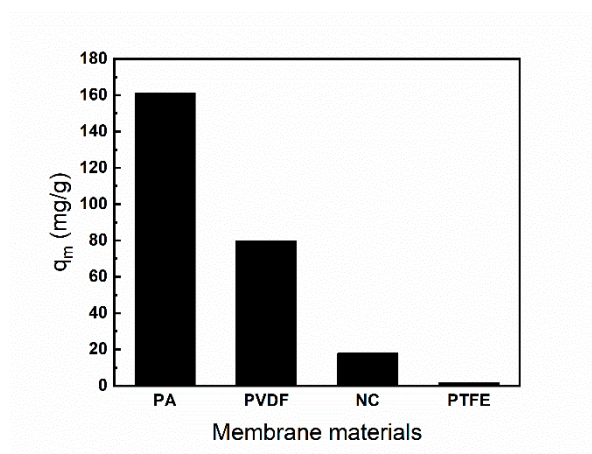

**Figure S2:** Comparison of maximum adsorption capacity calculated by Langmuir model for isothermal adsorption of four MFMs.

**Table S1:** The static contact angle of three MFMs.

|                             | PA    | NC    | PVDF  |
|-----------------------------|-------|-------|-------|
| The water<br>contact angles | 55.2° | 53.4° | 55.1° |
